# Supplementary material for: A domain knowledge enhanced yield based deep learning classifier identifies perineural invasion in oral cavity squamous cell carcinoma
Source: PubMed Central journal article supplement (PMC9638412; doi:10.3389/fonc.2022.951560), 2022-10-24
Supplement: Table_1.pdf [file Table_1.pdf]

**SUPPLEMENTARY TABLE 1.** Confusion Matrix and Testing Performance of Different Models for Identifying Perineural Invasion (Regions of Interest): Domain-KEY AI model *versus* HRNet\_v2 model

(A) CGMH method (Domain-KEY AI; number of nerve structures, n = 191)

|                     | Actual: positive ( <i>n</i> ) | Actual: negative ( <i>n</i> ) |                  |
|---------------------|-------------------------------|-------------------------------|------------------|
| Predicted: positive | TP (116)                      | FP (14)                       |                  |
| Predicted: negative | FN (7)                        | TN (54)                       |                  |
|                     | Sensitivity: 94.31%           | Specificity: 79.41%           | Accuracy: 89.01% |

(B) CGMH method (invasion model only; number of nerve structures, n = 191)

|                     | Actual: positive ( <i>n</i> ) | Actual: negative ( <i>n</i> ) |                  |
|---------------------|-------------------------------|-------------------------------|------------------|
| Predicted: positive | TP (122)                      | FP (68)                       |                  |
| Predicted: negative | FN (1)                        | TN (0)                        |                  |
|                     | Sensitivity: 99.19%           | Specificity: 0.00%            | Accuracy: 63.87% |
